# Supplementary material for: Induced genetic diversity through mutagenesis in wheat gene pool and significant use of SCoT markers to underpin key agronomic traits
Source: BMC Plant Biol. 2024 Jul 15;24:673. doi: 10.1186/s12870-024-05345-5 (PMC11247860; doi:10.1186/s12870-024-05345-5)
Supplement: Supplementary file 1 — Supplementary Material 1. [file 12870_2024_5345_MOESM1_ESM.xlsx]

## Sheet: Sheet5
		Supplementery Table S1. Mean Performance of All Genotypes at M1 and M2 Generations for Surveyed Morphological and Agronomical Traits in the 2019/2020 and 2020/2021 Seasons.
	No.	Genotype	Treatment		Plant height	No. spikes/plant	Spike length	No. spikelet/spike	No. grains/spikelet	100 grain weight
	1	Sids1	Control	M1	103.03	7.33	13.06	20	3.33	4.13
	2			M2	100.23	6.6	13.2	18.8c	3.1	3.8
	3	S1 17	0.0125 SA	M1	92.24	5.3	11.3	13.4	2.62	2.28
	4	S1 36	0.025 SA	M1	109.03	21	17.53	24	5	5.39
	5			M2	108.8	22.4	18.4	24.4	5.2	5.43
	6	S1 83	0.0125 HZ	M1	117.9	18.3	17.03	26	6	5.8
	7			M2	119.5	20.8	18.8	25.8	5.1	5.42
	8	S1 107	0.025 HZ	M1	108.4	20	18.03	22	5.33	6.3
	9			M2	107.7	19	18.1	25.8	5.2	5.67
	10	Sids12	Control	M1	98.3	5.33	13.7	18	3	4.1
	11			M2	100.5	7	13.14	19	2.7	3.98
	12	S12 129	0.0125 SA	M1	98.5	24	18.1	26	6.5	5.7
	13			M2	97.1	25.4	21.02	26.4	5	5.35
	14	S12 144	0.025 SA	M1	105.3	16	20.2	26.66	5	5.26
	15			M2	103.6	16.6	21.84	26..0	5.6	5.62
	16	S12 167	0.0125 HZ	M1	98.2	22	24.5	28	4.33	7.13
	17			M2	94.9	23.2	24.95	30.6	4.8	6.64
	18	S12 193	0.025 HZ	M1	88.16	18.3	19.1	30	6.33	6
	19			M2	90.8	19.4	20.03	28.2	5.1	6.73
	20	Giza168	Control	M1	101.16	8.33	13.2	20.6	3.33	3.2
	21			M2	99.73	6.7	12.89	17.2	2.8	3.16
	22	G168 56	0.0125 SA	M1	90.06	5.9	11.5	16.2	2.71	2.21
	23	G168 78	0.025 SA	M1	88.5	4.15	10.8	14.08	2.54	2.05
	24	G168 156	0.0125 HZ	M1	92.04	5.35	10.08	13.09	2.79	2.33
	25	G168 218	0.025 HZ	M1	108.9	18.33	17.9	26.6	6	4.9
	26			M2	112.34	20.7	17.95	25	4.7	5.32
